# Supplementary material
Source: PubMed Central journal article supplement (PMC6371650)
Supplement: ehp3889.smcontents.508.pdf [file ehp3889.smcontents.508.pdf]

**Note to readers with disabilities:** *EHP* strives to ensure that all journal content is accessible to all readers. However, some figures and Supplemental Material published in *EHP* articles may not conform to [508 standards](#) due to the complexity of the information being presented. If you need assistance accessing journal content, please contact [ehp508@niehs.nih.gov](mailto:ehp508@niehs.nih.gov). Our staff will work with you to assess and meet your accessibility needs within 3 working days.

### **Supplemental Material**

#### **Geographic, Demographic, and Temporal Variations in the Association between Heat Exposure and Hospitalization in Brazil: A Nationwide Study between 2000 and 2015**

Qi Zhao, Shanshan Li, Micheline S.Z.S. Coelho, Paulo H.N. Saldiva, Kejia Hu, Julie M. Arblaster, Neville Nicholls, Rachel R. Huxley, Michael J. Abramson, and Yuming Guo

#### **Table of Contents**

**Table S1.** Cause categories of hospitalizations and ICD-10 codes.

**Table S2.** Results of meta-regression: the differences in heat-hospitalization association across regions, population subgroups and cause categories for both sex.

**Table S3.** Results of meta-regression: the differences in heat-hospitalization association across 10 age-groups for men and for women, respectively; and the difference in heat-hospitalization association between men and women for each age-group.

**Table S4.** Hospitalizations (with 95% empirical confidence intervals) attributable to heat exposure over lag 0–7 days in the 1,814 Brazilian cities during 2000–2015 hot seasons for men and women.

**Table S5.** Results of sensitivity analyses: percentage change in the risk of hospitalization every 5°C increase in daily mean temperature during the hot season (at the national level).

**Figure S1.** Distribution of the enrolled 1,814 cities across the five Brazilian regions, and the location of Brazil in South America.

**Figure S2.** The effect of heat exposure (5°C increase in daily mean temperature) on hospitalizations across lag 0–7 days by region during 2000–2015 hot seasons. City-specific heat-hospitalization associations were estimated using quasi-Poisson regression with constrained lag model, which were then pooled at the regional and national levels using random-effect meta-analyses. Long-term trend and intra-seasonal variation, day of the week and holidays were controlled for.

**Figure S3.** The effect of heat exposure (5°C increase in daily mean temperature) on hospitalizations across lag 0–7 days by sex and age-group during 2000–2015 hot seasons. City-specific heat-hospitalization associations were estimated using quasi-Poisson regression with constrained lag model, which were then pooled at the national level using random-effect meta-analyses. Long-term trend and intra-seasonal variation, day of the week and holidays were controlled for.

**Figure S4.** The effect of heat exposure (5°C increase in daily mean temperature) on hospitalizations across lag 0–7 days by cause category during 2000–2015 hot seasons. City-specific heat-hospitalization associations were estimated using quasi-Poisson regression with constrained lag model, which were then pooled at the national level using random-effect meta-analyses. Long-term trend and intra-seasonal variation, day of the week and holidays were controlled for.

**Figure S5.** The fraction (A) and rate (B) of hospitalizations attributable to heat exposure over lag 0–7 days in the 1,814 Brazilian cities during 2000–2015 hot seasons. The best linear unbiased prediction of the cumulative association in each city was used to calculate the attributable burden.

**Figure S6.** The attributable rates (crude and age-standardized) of hospitalization for 11 cause categories during 2000–2015 hot seasons. The best linear unbiased prediction of the cumulative association in each city was used to calculate the attributable burden.

**Figure S7.** Association between daily mean temperature and hospitalization during 2000–2015 hot seasons (at the national level) modelled using a distributed lag non-linear model. A natural cubic spline with two degrees of freedom was applied for daily temperature. Long-term trend and intra-seasonal variation, day of the week and holidays were controlled for.
